## **White matter pathways supporting individual differences in epistemic and perceptual curiosity**

Ashvanti Valji<sup>1</sup>, Alisa Priemysheva<sup>1</sup>, Carl J. Hodgetts<sup>1</sup>, Alison G. Costigan<sup>1</sup>,  
Greg D. Parker<sup>2,1</sup>, Kim S. Graham<sup>1</sup>, Andrew D. Lawrence<sup>1</sup>, Matthias J. Gruber<sup>1</sup>

<sup>1</sup>Cardiff University Brain Research Imaging Centre (CUBRIC), School of Psychology, Cardiff University, Cardiff, United Kingdom, CF24 4HQ.

<sup>2</sup>Experimental MRI Centre (EMRIC), School of Bioscience, Cardiff University, Cardiff, United Kingdom, CF10 3AX.

Corresponding Authors:

Ashvanti Valji, ValjiA@cardiff.ac.uk;

Matthias J. Gruber, GruberM@cardiff.ac.uk;

## 1 **Abstract**

2 Across the lifespan, curiosity motivates us to learn, yet curiosity varies strikingly between  
3 individuals. Such individual differences have been shown for two distinct dimensions of  
4 curiosity: *epistemic curiosity* (EC), the desire to acquire conceptual knowledge, and  
5 *perceptual curiosity* (PC), the desire for sensory information. It is not known, however,  
6 whether both dimensions of curiosity depend on different brain networks and whether inter-  
7 individual differences in curiosity depend on variation in anatomical connectivity within these  
8 networks. Here, we investigated the neuroanatomical connections underpinning individual  
9 variation in trait curiosity. Fifty-one female participants underwent a two-shell diffusion MRI  
10 sequence and completed questionnaires measuring EC and PC. Using deterministic  
11 spherical deconvolution tractography we extracted microstructural metrics (fractional  
12 anisotropy (FA) and mean diffusivity (MD)) from two key white matter tracts: the fornix  
13 (implicated in novelty processing, exploration, information seeking and episodic memory)  
14 and the inferior longitudinal fasciculus (ILF) (implicated in semantic learning and memory). In  
15 line with our predictions, we found that EC – but not PC – correlated with ILF microstructure.  
16 Fornix microstructure, in contrast, correlated with both EC and PC, with posterior  
17 hippocampal fornix fibres - associated with posterior hippocampal network connectivity -  
18 linked to PC specifically. These findings suggest that differences in distinct dimensions of  
19 curiosity map systematically onto specific white matter tracts underlying well characterized  
20 brain networks. Furthermore, the results pave the way to study the anatomical substrates of  
21 inter-individual differences in dimensions of trait curiosity that motivate the learning of  
22 distinct forms of knowledge and skills.

## 23 Introduction

24 Curiosity is described as the desire for new information that motivates seeking out and  
25 acquiring knowledge (Loewenstein, 1994; Litman, 2005). The momentary experience of  
26 curiosity (state curiosity) can be seen as an emotional-motivational state that facilitates  
27 exploration and knowledge acquisition (Silvia & Kashdan, 2009; Gottlieb & Oudeyer, 2018).  
28 Consistent with this idea, studies have shown that states of high curiosity enhance long-term  
29 memory (Kang et al., 2009; Gruber et al., 2014; McGillivray et al., 2015; Marvin & Shohamy,  
30 2016; Stare et al., 2018; Galli et al., 2018). Furthermore, recent neuroimaging evidence  
31 suggests that state curiosity enhances memory via increased activation in the mesolimbic  
32 dopaminergic circuit including the hippocampus (Gruber et al., 2014; Kang et al., 2009).  
33 Notably, the positive effects of state curiosity on memory have been found to greatly vary  
34 between individuals in that individual variations observed in the midbrain and hippocampus  
35 activity predict the magnitude of memory enhancements (Gruber et al., 2014).

36 Over the last decades, between-person differences in curiosity as a personality trait  
37 (i.e. dispositional tendencies to experience and express curiosity) have been well  
38 characterized. Based on Berlyne's (1954) suggestion that different types of curiosity are  
39 aroused by opportunities for new knowledge or sensory stimulation, trait curiosity has been  
40 split into two broad facets: curiosity as engagement with semantic knowledge - *epistemic*  
41 *curiosity* (EC); or as engagement with sensory stimuli - *perceptual curiosity* (PC). Building on  
42 Loewenstein's (1994) model of aversive curiosity, Litman and colleagues further proposed  
43 that these two aspects of curiosity can be further separated into diversive/interest-based and  
44 specific/deprivation-based curiosity. Diversive/interest curiosity is linked to positive affect  
45 and is thought to energize and to direct exploration with the ultimate goal of stimulating one's  
46 interest and reduce boredom. In contrast, specific/deprivation curiosity is accompanied by a  
47 negative, frustrated feeling of information deprivation and uncertainty, associated with a  
48 specific knowledge gap, that people are motivated to eliminate (Berlyne, 1966; Litman, 2005,

49 2008, Litman & Spielberger, 2003; Litman & Jimerson, 2004). Importantly, such inter-  
50 individual differences in curiosity have been found to predict job performance and academic  
51 achievement in the real world (Grossnickle, 2016; Kashdan & Yuen, 2007; Mussel, 2013).

52 The neuroanatomical substrates underpinning individual differences in trait curiosity  
53 are unknown. Studies investigating higher-order personality traits subsuming curiosity,  
54 however, provide a fruitful starting point to investigate the neuroanatomical connections  
55 underlying trait curiosity (DeYoung, 2014; Woo et al., 2014). For example, Privado et al.  
56 (2017) found an association between 'openness to experience' and microstructure of the  
57 inferior longitudinal fasciculus (ILF), a ventral, temporo-occipital association tract implicated  
58 in semantic learning and memory (Herbet et al., 2018; Hodgetts et al., 2015, 2017; Ripollés  
59 et al., 2017). Additionally, Cohen et al. (2009) showed that individual differences in novelty  
60 seeking were associated with microstructure of the fornix, a key pathway that connects the  
61 hippocampus - involved in novelty detection, exploration, information seeking and episodic  
62 memory (O'Keefe & Nadel, 1978; Kumaran & Maguire, 2009; Murray et al., 2017; Voss et  
63 al., 2017) - to the thalamus, ventral striatum, amygdala and prefrontal cortex (Saunders &  
64 Aggleton, 2007; Aggleton et al. 2015).

65 Here, we used multi-shell diffusion MRI and spherical deconvolution tractography to  
66 investigate whether individual differences in ILF and fornix microstructural metrics (i.e.,  
67 fractional anisotropy (FA) and mean diffusivity (MD)) would be associated with individual  
68 differences in trait curiosity. Given the importance of ILF to semantic cognition (Jouen et al.,  
69 2015; Chen et al., 2017; Hodgetts et al., 2017; Ripollés et al., 2017; Herbet et al., 2018), we  
70 predicted an association between ILF microstructure and EC but not PC. In contrast, given  
71 that hippocampal circuitry supports novelty detection, exploratory behaviour and information  
72 seeking in many domains (O'Keefe & Nadel, 1978; Kumaran & Maguire, 2009; Otmakhova  
73 et al., 2013; Murray et al., 2017; Voss et al., 2017) we predicted an association between  
74 fornix microstructure and *both* EC and PC. Further, given evidence of a posterior (fine-

75 grained) to anterior (gist-based) gradient of representational specialization along the long-  
76 axis of the hippocampus (Ranganath & Ritchey, 2012; Poppenk et al. 2013; Strange et al.,  
77 2014; Murray et al., 2017), we predicted that microstructure of fornical fibres associated with  
78 posterior and anterior hippocampus (Christiansen et al., 2017; Saunders & Aggleton, 2007)  
79 would be more strongly associated with PC and EC, respectively.

80

## 81 **Results**

82 *Epistemic curiosity – but not perceptual curiosity – correlates with ILF microstructure*

83 *ILF FA.* We conducted a series of permutation tests that investigated the relationships  
84 between trait curiosity scores and microstructure in *a-priori* selected anatomical tracts. For  
85 each permutation test, we corrected for multiple comparisons for the two subscales  
86 separately within the EC and PC scale. The first permutation test targeted ILF FA and EC.  
87 We found that bilaterally averaged ILF FA did not significantly correlate with either subscale  
88 of EC (deprivation EC,  $r(50) = 0.143$ ,  $p_{corr} = 0.243$ , 95% CI [-0.105, 0.364]; interest EC,  $r(50)$   
89  $= 0.191$ ,  $p_{corr} = 0.151$ , 95% CI [-0.0734, 0.440]). A further permutation test was conducted on  
90 bilaterally averaged ILF FA with the two subscales of PC, where again neither subscale  
91 significantly correlated with bilateral ILF FA (specific PC,  $r(50) = 0.109$ ,  $p_{corr} = 0.329$ , 95% CI  
92 [-0.229, 0.427]; diversive PC,  $r(50) = 0.207$ ;  $p_{corr} = 0.122$ , 95% CI [-0.109, 0.453]).

93

94 *ILF MD.* Targeting ILF MD, a permutation test revealed a significant negative correlation  
95 between ILF MD and interest EC ( $r(50) = -0.289$ ,  $p_{corr} = 0.038$ , 95% CI [-0.489, 0.007],  
96 **Figure 1A**) and a significant negative correlation between ILF MD and deprivation EC ( $r(50)$   
97  $= -0.388$ ,  $p_{corr} = 0.004$ , 95% CI [-0.572, -0.124], **Figure 1B**). In contrast, bilateral ILF MD was  
98 not significantly correlated with any subscale of PC (diversive PC,  $r(50) = 0.020$ ,  $p_{corr} =$

99 0.710, 95% CI [-0.260, 0.271], **Figure 1C**); specific PC,  $r(50) = -0.134$ ,  $p_{corr} = 0.267$ , 95% CI  
100 [-0.392, 0.157], **Figure 1D**).  
101

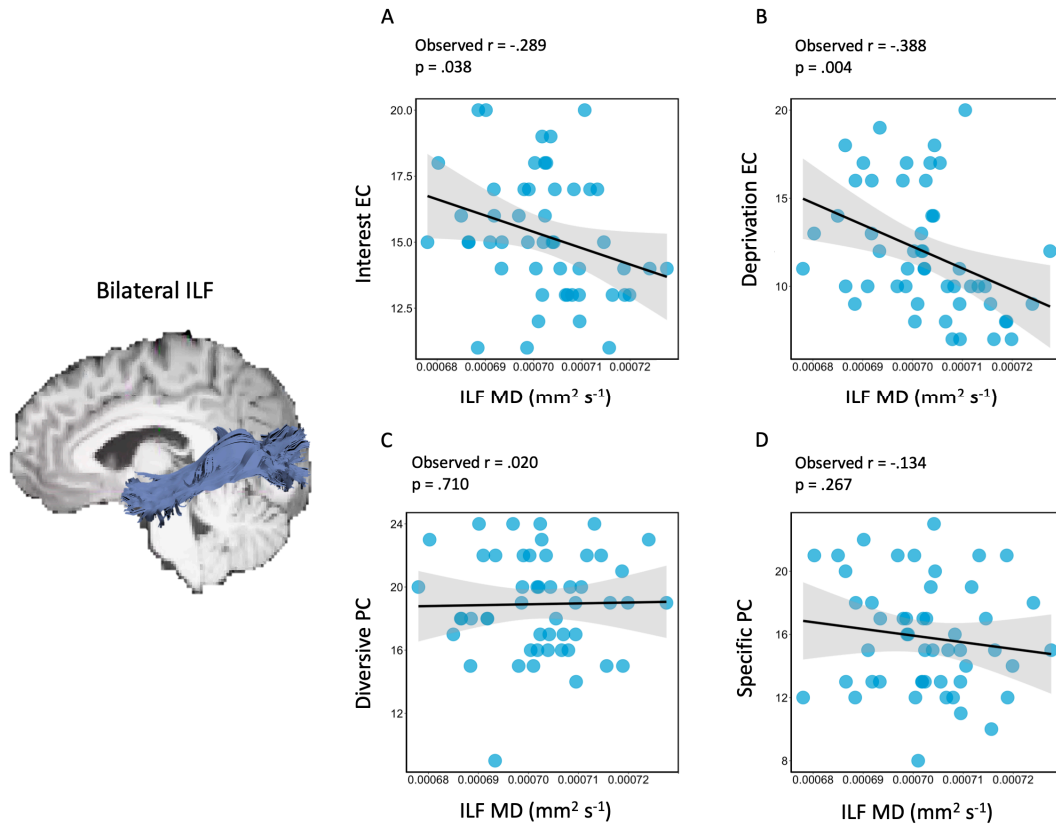

102  
103 **Figure 1. Inferior longitudinal fasciculus microstructure only shows relationship with**  
104 **epistemic curiosity.** These results were obtained from non-parametric permutation tests  
105 that corrected for multiple comparisons across the two subscales within the Epistemic  
106 Curiosity scale (EC) and Perceptual Curiosity scale (PC). A significant negative correlation  
107 was found between MD (mm<sup>2</sup> s<sup>-1</sup>) of the inferior longitudinal fasciculus (ILF) with interest-  
108 and deprivation EC (**A**, **B**, respectively). No significant correlations were found between ILF  
109 MD (mm<sup>2</sup> s<sup>-1</sup>) with diverse and specific PC (**C**, **D**, respectively). The line of best fit and 95%  
110 confidence interval (CI) are shown on each scatter plot with 50 data points.  
111

112 Neuropsychological and imaging evidence suggests that semantic knowledge is  
113 represented bilaterally in the anterior temporal lobes (ATL) but may show subtle inter-  
114 hemispheric (left > right) gradations for verbal stimuli (Rice et al., 2015; Hoffman & Lambon  
115 Ralph, 2018). Therefore, we asked whether the significant correlation between bilateral ILF  
116 MD and both EC subscales were driven specifically by the left as opposed to the right ILF.  
117 Separate permutation tests were conducted for each subscale of EC with left ILF MD and  
118 right ILF MD as the two variables of interest (i.e., correcting for multiple comparisons across  
119 the two hemispheres). The first permutation test on deprivation EC found that both left and  
120 right ILF MD significantly correlated with deprivation EC (left ILF:  $r(50) = -0.341$ ,  $p_{corr} =$   
121  $0.016$ , 95% CI [-0.566, -0.078]; right ILF:  $r(50) = -0.358$ ,  $p_{corr} = 0.012$ , 95% CI [-0.564, -  
122  $0.106$ ]). The second permutation test investigating whether interest EC correlates with left  
123 and right ILF MD indicated a numerical negative relationship for both tracts but neither  
124 reached significance with the adopted multiple comparisons correction (left ILF:  $r(50) = -$   
125  $0.254$ ,  $p_{corr} = 0.066$ , 95% CI [-0.491, 0.086]); right ILF:  $r(50) = -0.267$ ,  $p_{corr} = 0.051$ , 95% CI [-  
126  $0.472$ , -0.056]).

127

128 In order to assess whether bilateral ILF MD correlations with subsets of EC were  
129 significantly different from each other as well as subsets of PC, we conducted directional  
130 Olkin's Z-tests (Cocor R package; Diedenhofen & Musch, 2015). For EC, we found that the  
131 correlation between ILF MD and deprivation EC was not significantly different to the  
132 correlation between ILF MD and interest EC ( $z(50) = 0.849$ ,  $p = 0.198$ ). Comparing EC and  
133 PC subscales, however, we found that the correlation between ILF MD and deprivation EC  
134 was significantly stronger than the correlation between ILF MD and specific PC ( $z(50) =$   
135  $1.721$ ,  $p = 0.043$ ), and the correlation between ILF MD and diversive PC ( $z(50) = 2.212$ ,  $p =$   
136  $0.014$ ). Furthermore, we found that the correlation between ILF MD and interest EC was  
137 significantly stronger than the correlation between ILF MD and diversive PC ( $z(50) = 2.407$ ,

138  $p = 0.008$ ), however, the correlation between ILF MD and interest EC was not significantly  
139 stronger than the correlation between ILF MD and specific PC ( $z(50) = 1.172$ ,  $p = 0.121$ ).

140 *Interest-based epistemic curiosity correlates with fornix microstructure*

141 *Fornix FA.* Regarding fornix FA, permutation tests revealed a significant positive correlation  
142 between interest EC and fornix FA ( $r(51) = 0.281$ ,  $p_{corr} = 0.039$ , 95% CI [-0.008, 0.491],  
143 **Figure 2A**). In contrast, deprivation EC showed no significant correlation with fornix FA  
144 ( $r(51) = 0.155$ ,  $p_{corr} = 0.214$ , 95% CI [-0.120, 0.422], **Figure 2B**). A second permutation test  
145 was conducted on fornix FA with the two subscales of PC, diversive and specific, but neither  
146 subscale significantly correlated with fornix FA (specific PC,  $r(51) = 0.111$ ,  $p_{corr} = 0.328$ , 95%  
147 CI [-0.266, 0.4252]; diversive PC,  $r(51) = 0.064$ ,  $p_{corr} = 0.466$ , 95% CI [-0.204, 0.351]).

148

149 *Fornix MD.* Despite the earlier findings of a significant positive correlation between interest  
150 EC and fornix FA, permutation tests revealed no significant negative correlation between  
151 fornix MD and interest EC ( $r(51) = -0.110$ ,  $p_{corr} = 0.332$ , 95% CI [-0.372, 0.171]) or  
152 deprivation EC ( $r(51) = -0.029$ ,  $p_{corr} = 0.574$ , 95% CI [-0.314, 0.296]). The second  
153 permutation test, investigating the association between fornix MD and the two subscales of  
154 PC, also showed that neither specific nor diversive PC significantly correlated with fornix MD  
155 (specific PC,  $r(51) = -0.250$ ,  $p_{corr} = 0.070$ , 95% CI [-0.499, 0.054]; diversive PC, ( $r(51) = -$   
156  $0.159$ ;  $p_{corr} = 0.214$ , 95% CI [-0.398, 0.113]).



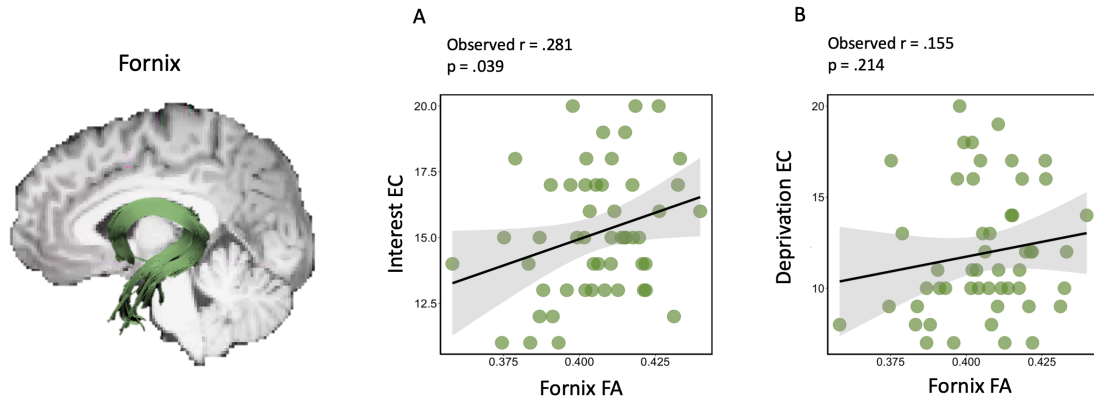

157 **Figure 2. Fornix microstructure shows relationship with aspects of epistemic**  
158 **curiosity.** These results were obtained from non-parametric permutation tests correcting for  
159 multiple comparisons across subscales within the Epistemic Curiosity scales (EC). A  
160 significant positive correlation was found between fractional anisotropy (FA) of the whole  
161 fornix and interest EC (A) but not with deprivation EC (B). The line of best fit and 95%  
162 confidence interval (CI) are shown on each scatter plot with 51 data points.

163

164 *Specific perceptual curiosity shows an association with posterior hippocampal fornix*  
165 *microstructure*

166 Recent accounts postulate a posterior-anterior gradient of representational granularity along  
167 the long axis of the hippocampus, linked to a gradient in anatomical connectivity (Aggleton,  
168 2012; Strange et al., 2014), from ‘fine’ perceptual detail to ‘course’ or gist-like  
169 representations (Poppenk et al., 2013; Robin and Moscovitch, 2017; Sheldon et al., 2019).  
170 This account suggests that a stronger correlation might be evident between posterior  
171 hippocampal fornix and PC, and anterior hippocampal fornix and EC, respectively. To test  
172 this, we explored the relationship between *specific* PC (i.e., associated with detailed  
173 perceptual information seeking) and anterior/posterior hippocampal fornix MD. Conversely,  
174 to pinpoint how EC is associated with the anterior/posterior hippocampal fornix FA, we  
175 focussed our analyses on *interest* EC.

176 A first permutation test (corrected for multiple comparisons) targeted the three  
177 individual fornix segmentations (i.e., left anterior, right anterior, bilateral posterior  
178 hippocampal fornix). (Note that posterior hippocampal fornical fibres form the medial fornix  
179 cannot easily be separated into separate hemispheres). We found that specific PC  
180 significantly correlated with posterior hippocampal fornix MD ( $r(51) = -0.277$ ,  $p_{corr} = 0.047$ ,  
181 95% CI [-0.528,0.056], **Figure 3B**), but it did not correlate significantly with left or right  
182 anterior hippocampal fornix MD (left: ( $r(51) = -0.189$ ,  $p_{corr} = 0.176$ , 95% CI [-0.451,0.062]),  
183 **Figure 3A**; right: ( $r(51) = -0.028$ ,  $p_{corr} = 0.610$ , 95% CI [-0.289,0.264]). This finding suggests  
184 that specific PC might mainly be supported by fornical fibres that have connections to the  
185 posterior hippocampus. Olkin's z-tests were employed to test whether the correlation  
186 between specific PC and posterior hippocampal fornix MD was significantly different than the  
187 correlation between specific PC and left/right anterior hippocampal fornix MD. The  
188 correlation between posterior hippocampal fornix MD and specific PC was not significantly  
189 different than the correlation between *left* anterior hippocampal fornix MD ( $z(51) = -0.934$ ,  $p$   
190  $= 0.175$ ), however, it was significantly different than the correlation between *right* anterior  
191 hippocampal fornix MD and specific PC ( $z(51) = -2.268$ ,  $p = 0.012$ ).

192 In contrast, although we found that interest EC significantly correlates with *whole*  
193 fornix FA, the three distinct fornix segmentations did not reveal significant correlations with  
194 interest EC after correcting for multiple comparisons (left anterior hippocampal fornix FA,  
195  $r(51) = 0.269$ ,  $p_{corr} = 0.065$ , 95% CI [-0.029, 0.521], **Figure 3C**; right anterior hippocampal  
196 fornix FA ( $r(51) = 0.080$ ,  $p_{corr} = 0.479$ , 95% CI [-0.161, 0.307]; posterior hippocampal fornix  
197 FA,  $r(51) = 0.272$ ,  $p_{corr} = 0.062$ , 95% CI [-0.009, 0.479], **Figure 3D**). Olkin's z-test indicated  
198 that the correlation between left anterior hippocampal fornix FA and interest EC was not  
199 significantly different than the correlation between posterior hippocampal fornix FA and  
200 interest EC ( $z(51) = 0.031$ ,  $p = 0.488$ ). In addition, Olkin's z-test indicated that the  
201 correlation between right anterior hippocampal fornix FA and interest EC was not

202 significantly stronger than the correlation between posterior hippocampal fornix FA and  
203 interest EC ( $z(51) = 1.443, p = 0.075$ ).  
204

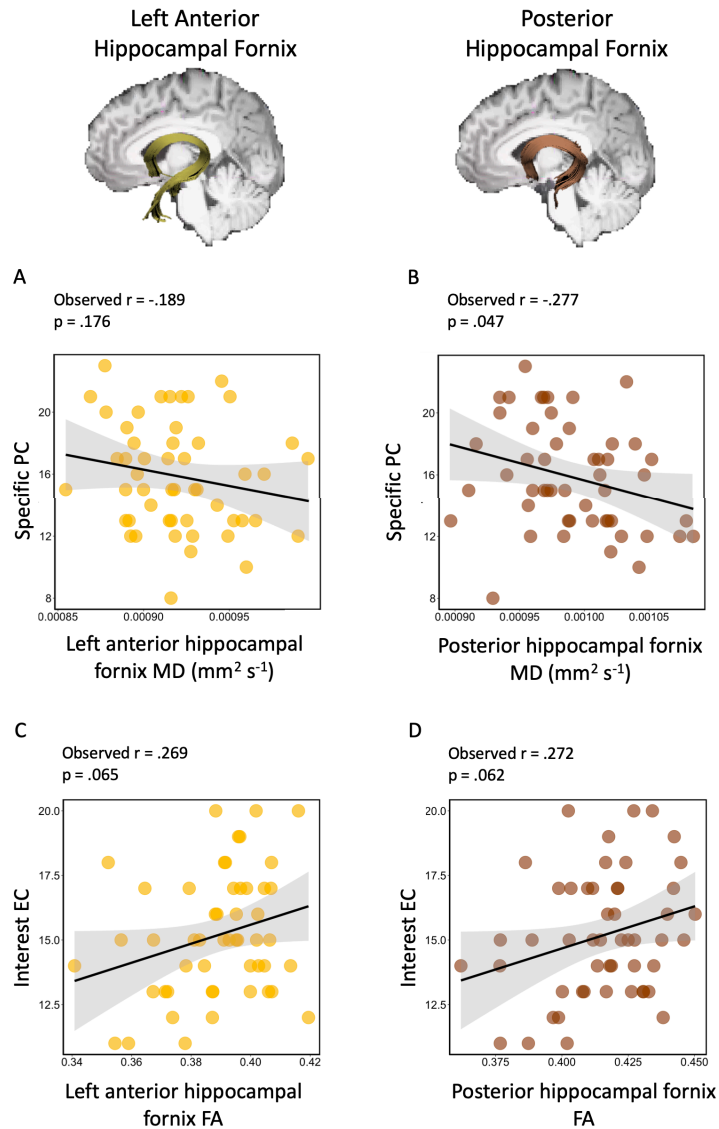

205  
206 **Figure 3. Specific perceptual curiosity, but not interest epistemic curiosity, shows a**  
207 **significant difference between correlations with anterior and posterior hippocampal**  
208 **fornix microstructure.** These results were obtained from non-parametric permutation tests  
209 correcting for multiple comparisons across the three individual fornix segmentations. Specific  
210 PC did not significantly correlate with MD ( $\text{mm}^2 \text{s}^{-1}$ ) of the left anterior hippocampal fornix

211 (i.e., fornix fibres that project specifically into anterior hippocampus) **(A)** but was found to  
212 negatively correlate with MD ( $\text{mm}^2 \text{s}^{-1}$ ) of the posterior hippocampal fornix **(B)**. Interest EC  
213 did not significantly correlate with FA of the left anterior hippocampal fornix **(C)**, nor with FA  
214 of the posterior hippocampal fornix **(D)**. The line of best fit and 95% confidence interval (CI)  
215 are shown on each scatter plot with 51 data points.

216 In summary, we found that two individual subscales that tap into epistemic and  
217 perceptual curiosity traits showed significant correlations with fornix microstructure. In  
218 particular, we found that *whole* fornix FA significantly correlated with interest EC suggesting  
219 that interest EC relates to microstructure in fornical fibres that connect with anterior and  
220 posterior hippocampus. In contrast, specific PC specifically correlated with posterior  
221 hippocampal fornix microstructure, which was significantly stronger compared to the  
222 relationship with right anterior hippocampal fornix microstructure.

223

## 224 **Discussion**

225 Curiosity motivates us to seek out information and it facilitates knowledge acquisition  
226 (Loewenstein, 1994; Litman, 2005; Silvia & Kashdan, 2009; Gottlieb & Oudeyer, 2018).  
227 While a fledgling line of research has shown that curiosity states - the momentary  
228 experience of curiosity - enhance hippocampus-dependent memory (for a review, see  
229 Gruber et al., 2019), there is also a broad spectrum of variation in *stable* tendencies to  
230 experience or express curiosity – trait curiosity. Importantly, trait curiosity has been shown to  
231 predict real-world outcomes, such as academic achievement and job performance (Kashdan  
232 & Yuen, 2007; Mussel, 2013). Here, we found that ILF microstructure correlated with both  
233 interest and deprivation EC traits, but not with PC traits. Additionally, fornix microstructure  
234 was associated with interest - but not deprivation - EC, and specific - but not diverse - PC.

235 In particular, while microstructure of the whole fornix correlated with interest EC, specific PC  
236 correlated with posterior hippocampal fornix microstructure. These findings support the  
237 notion that curiosity is a multifaceted motivational construct and that distinct aspects of  
238 curiosity map onto specific white matter tracts underlying well-characterized brain networks  
239 that support distinct representational systems (Murray et al., 2017).

#### 240 *Epistemic curiosity and ILF microstructure*

241 The ILF, which connects ventral aspects of ATL, occipito-temporal, and occipital cortex  
242 (Herbet et al., 2018; Panesar et al., 2018), appears critical for bidirectional interactions  
243 between an ATL-based bilateral semantic 'hub' and representations supported by occipital  
244 and middle/posterior temporal regions (Patterson et al., 2007; Lambon Ralph et al., 2017;  
245 Chen et al., 2017). In addition to demonstrations of altered ILF microstructure in semantic  
246 dementia (Agosta et al., 2010), recent studies report associations between bilateral ILF  
247 microstructure and individual differences in semantic learning (Ripollés et al., 2017) and  
248 memory (Horowitz-Kraus et al., 2014; Hodgetts et al., 2017). Here, we found that  
249 participants with reduced diffusivity (i.e., lower MD values) in the ILF showed higher trait  
250 scores in both dimensions of EC. Critically, we found that the ILF supported both the general  
251 exploration of semantic information motivated by positive affect (EC as a feeling-of-interest)  
252 but also the search for specific information in order to close a knowledge gap (EC as an  
253 aversive feeling-of-deprivation) (Litman, 2005, 2008; Loewenstein, 1994; Lauriola et al.,  
254 2015). One explanation for this may be that perhaps the more that we learn, the more we  
255 are attuned to the gaps in our conceptual knowledge, and attending to these gaps is tension-  
256 producing and enjoyable at the same time (Loewenstein, 1994). In addition, the association  
257 between EC and ILF microstructure is in line with the literature on the higher-order  
258 personality trait 'openness to experience', of which curiosity is one facet (Woo et al., 2014).  
259 Privado et al. (2017) demonstrated that ILF microstructure was associated with levels of trait  
260 'openness'. Our findings extend this work by pinpointing that the exploration and specific

261 search for semantic information might be one critical factor that carries the association  
262 between 'openness' and ILF microstructure.

### 263 *Curiosity and Fornix microstructure*

264 The hippocampus is a medial temporal lobe structure supporting the encoding and recall of  
265 long-term memory (Burgess et al., 2002; Davachi, 2006; Eichenbaum et al., 2007; Murray et  
266 al., 2018). Given that the hippocampus has been implicated in a number of processes critical  
267 to curiosity, including exploration, reward seeking and novelty detection (O'Keefe & Nadel,  
268 1978; Otmakhova et al., 2013; Murray et al., 2017; Kumaran & Maguire, 2009; Voss et al  
269 2017), we investigated the relationship between curiosity and microstructure of the fornix -  
270 the principal tract linking the hippocampus with sites beyond the temporal lobe (Saunders &  
271 Aggleton 2007; Aggleton et al., 2015). Regarding the relationship between curiosity and  
272 fornix microstructure, we performed analyses targeting the microstructure of the whole  
273 fornix, but also the anterior and posterior hippocampal fornix segments that correspond to  
274 the functional subdivisions of the anterior and posterior hippocampus, respectively  
275 (Christiansen et al., 2017; Saunders and Aggleton, 2007). Given current theoretical ideas,  
276 the anterior and posterior hippocampal fornix fibres may reflect functional subdivisions of the  
277 anterior and posterior hippocampus reflecting gist-based (schematic) and perceptually  
278 detailed (episodic) information, respectively (Robin & Moscovitch, 2017; Poppenk et al.,  
279 2013; Ranganath & Ritchey, 2012; Sheldon et al., 2019). Therefore, the present study  
280 investigated whether the functional subdivisions of the fornix, connecting to the anterior and  
281 posterior hippocampus, may potentially map onto diversive/interest and specific/deprivation  
282 curiosity, respectively. Partially consistent with this hypothesis, we found that posterior  
283 hippocampal fornix (but not the anterior hippocampal fornix) microstructure (FA) showed an  
284 association with specific PC, which is described as the desire to reduce uncertainty by  
285 searching for specific novel perceptual information. Of note, recent work has highlighted a  
286 role for (posterior) HC circuitry in detailed visual exploration (Liu et al., 2017; Voss et al.,

287 2017) and Risko et al. (2012) used a scene-viewing task to demonstrate that participants'  
288 PC trait score predicted the degree to which they explored visual scenes. These studies  
289 using eye-movements to investigate hippocampal- and curiosity-based visual exploration  
290 and our present findings on fornix microstructure highlight how individual differences in  
291 curiosity may play a critical part in the degree of exploration of one's perceptual  
292 environment, serving to accumulate information from the visual world, contributing to the  
293 formation of detailed memory representations mediated by posterior hippocampal circuitry.

294

295 In contrast, we found that interest EC positively correlated with microstructure of the  
296 whole fornix, rather than anterior hippocampal fornix specifically. Interest EC is described as  
297 the desire for diversive exploration and information seeking, which is accompanied by  
298 positive affect (Litman, 2008). Although interest EC reflects the reward-driven explorative  
299 search for new knowledge, presumably involving interactions between anterior hippocampal  
300 schematic or gist-based representations and reward/value representations mediated by  
301 nucleus accumbens and ventromedial prefrontal cortex (Poppenk et al., 2013; Aggleton et  
302 al., 2015), interest EC also triggers search for detailed information rather than gist-based  
303 information, presumably involving more fine-grained posterior hippocampal representations.  
304 Interest EC may therefore involve coordination along the entire hippocampal longitudinal  
305 axis, in line with the graded and overlapping nature of long axis connectivity (Aggleton,  
306 2012; Strange et al., 2014).

307

### 308 *Limitations and future directions*

309 First, our correlational analyses cannot establish causality in brain-behaviour relationships.  
310 Longitudinal studies would be needed to determine whether trait curiosity shapes white  
311 matter connections, vice versa, or whether both reinforce each other in a bidirectional  
312 manner. For instance, recent work on adaptive myelination suggests that change in  
313 myelination through activity-dependent adaptation of an initially hard-wired process occurs in

314 response to experiences and contributes to learning (Bechler et al., 2018). Second,  
315 interpreting the biological relevance of tensor metrics from white matter tracts, such as FA  
316 and MD, can be challenging. Whilst FA and MD are typically inversely related, where a high  
317 FA and low MD suggest 'stronger' white matter connectivity (Vettel et al., 2017), we found  
318 that for the majority of microstructure-curiosity correlations that only one of the two diffusion  
319 metrics significantly correlated with curiosity, suggesting they are not redundant measures.  
320 Dissociations between FA and MD measures could be due to a number of biological  
321 properties such as axon diameter and density, myelination and the arrangement of fibres in  
322 a given voxel (Beaulieu, 2002). For instance, high FA has been found to reflect high myelin  
323 density and structured histological orientation whereas high values of MD are more likely to  
324 reflect low myelin density and diffuse histological orientation (Seehaus et al., 2015). Future  
325 work on the microstructural correlates of trait curiosity could apply advanced modelling  
326 techniques, such as the "Neurite Orientation Dispersion and Density Imaging" model  
327 (NODDI (Zhang et al., 2012)) for estimating biologically specific properties of the white  
328 matter.

329

330 Our study involved self-report questionnaires to measure distinct curiosity traits.  
331 While self-report questionnaires of personality have well known limitations (Vazire &  
332 Carlson, 2010), such instruments, unlike task-based measures, are designed to maximise  
333 consistent inter-individual differences, have high reliability and predict real world outcomes  
334 (Grossnickle, 2016; Eisenberg et al., 2019; Enkavi et al., 2019). Nevertheless, future studies  
335 should consider examining the link between task-evoked states of curiosity and trait  
336 curiosity, and whether the same white matter tracts mediate state effects of curiosity in  
337 different aspects of learning and memory.

338

339 *Conclusion*

340 The present study found inter-individual variation in the microstructure of the fornix related to



341 interest EC and inter-individual variation in the microstructure of the ILF related to both  
342 interest and deprivation EC. Furthermore, posterior hippocampal fornix microstructure was  
343 associated with specific PC. In conclusion, our findings on the relationship between curiosity  
344 traits and anatomical connections underlying well characterized brain networks provide a  
345 foundation for future studies to examine the relationship between curiosity traits, curiosity  
346 states and their neuroanatomical substrates. Our findings pave the way to further  
347 understand inter-individual differences in curiosity and which aspects of curiosity benefit  
348 language, memory and other cognitive processes cultivating a deeper knowledge and skill  
349 set.

350

## 351 **Materials and Methods**

### 352 *Participants*

353 Fifty-one healthy female adult undergraduate students, with a mean age of 20 years (SD  $\pm$   
354 1, range = 19-24) participated. They provided written consent prior to participating in the  
355 study, which was approved by the Cardiff University Research Ethics Committee, and  
356 received a remuneration of approximately £25 for their participation.

357

### 358 *Trait curiosity measures*

359 Participants completed the *Epistemic Curiosity Scale (EC)* (Litman, 2008) and the  
360 *Perceptual Curiosity Scale (PC)* (Collins et al., 2004), along with other measures not  
361 relevant to the current study. The EC scale consists of five interest EC items and five  
362 deprivation EC items with participants answering on a scale ranging from 1 (*almost never*) to  
363 4 (*almost always*). The interest EC items are associated with behaviours that stimulate  
364 positive affect, or involve learning something completely new (e.g. "I enjoy learning about  
365 subjects that are unfamiliar to me"). In contrast, deprivation EC items describe behaviours  
366 that reduce negative feelings of information deprivation and uncertainty (e.g. "I can spend

367 hours on a single problem because I just can't rest without knowing the answer"). The PC  
368 scale (Collins et al., 2004) comprised of twelve items (6 diversive PC items and 6 specific  
369 PC items) and again participants respond on a scale that ranged from 1 (*almost never*) to 4  
370 (*almost always*). The diversive PC items describe exploratory behaviours in which one seeks  
371 out new places and a broad range of sensory stimulation (e.g. "I like to discover new places  
372 to go"), whereas specific PC describes exploration of novel, specific and sensorially  
373 stimulating stimuli (e.g. "When I hear a strange sound, I usually try to find out what caused  
374 it"). The Cronbach's alpha coefficients for the scales were all  $\geq .70$  suggesting good  
375 internal consistency.

376

### 377 *Imaging acquisition*

378 Imaging data were obtained at CUBRIC, Cardiff University on a 3 Tesla MRI scanner  
379 (Siemens Magnetom Prisma) with a 32-channel head coil. T1-weighted structural 3D images  
380 were acquired using an MPRAGE sequence (orientation = sagittal; TR = 2250ms; TE =  
381 3.06ms; TI = 900ms; flip angle = 9°; FOV = 256mm<sup>2</sup>; slice thickness = 1mm; voxel size =  
382 1mm<sup>3</sup>; number of slices = 224; bandwidth = 230Hz/pixel; total acquisition time = 7 minutes  
383 36 seconds).

384 Diffusion weighted images were acquired using a multi-shell sequence (orientation =  
385 transversal/axial; TR = 9400ms; TE = 67.0ms; FOV = 256mm<sup>2</sup>; slice thickness = 2mm; voxel  
386 size = 2mm<sup>3</sup>; number of slices = 80). Diffusion gradients were applied in (i) 30 isotropic  
387 directions by using a diffusion-weighted factor  $b=1200\text{sec}/\text{mm}^2$ , (ii) in 60 isotropic directions  
388 by using a diffusion-weighted factor  $b=2400\text{sec}/\text{mm}^2$ , and (iii) a volume without diffusion  
389 gradients ( $b=0\text{sec}/\text{mm}^2$ ) (bandwidth = 1954Hz/pixel; total acquisition time = 15 minutes 51  
390 seconds).

### 391 *Diffusion MRI pre-processing*

392 T1-weighted structural images were subjected to a 'brain-tissue only' mask using FSL's  
393 Brain Extraction Tool (Smith, 2002). Using ExploreDTI (v4.8.3; Leemans et al., 2009) each  
394 b-value image was then co-registered to the T1 structural image. Subsequently, all b-value  
395 images were corrected for head motion and eddy currents within ExploreDTI. Tensor fitting  
396 was conducted on the b-1200 data given the tensor model assumes hindered (Gaussian)  
397 diffusion, and at lower b-values more of the signal is due to hindered rather than restricted  
398 diffusion (Jones et al., 2013). To correct for voxel-wise partial volume artefacts arising from  
399 free water contamination, the two-compartment 'Free Water Elimination' (FWE) procedure  
400 was applied to the current b-1200 data – this improves reconstruction of white matter tracts  
401 near the ventricles such as the fornix (Pasternak et al., 2009, 2014), yielding whole brain  
402 voxel-wise free-water corrected FA and MD tissue maps. Following FWE, corrected  
403 diffusion tensor-derived structural metrics were computed. Fractional anisotropy (FA),  
404 reflects the extent to which diffusion within biological tissue is anisotropic (constrained along  
405 a single axis). MD ( $10^{-3} \text{ mm}^2 \text{ s}^{-1}$ ) reflects overall degree of diffusivity (Vettel et al., 2017). The  
406 resulting free water corrected FA and MD maps were inputs for the tractography analysis.

407

#### 408 *Tractography*

409 As higher b-values allow for better fibre orientation estimations (Vettel et al., 2017), we  
410 performed tractography on the b-2400 data using damped Richardson-Lucy spherical  
411 deconvolution (dRL-SD). Spherical deconvolution provides a direct estimate of the  
412 underlying distribution of fibre orientations in the brain and when applied to tractography  
413 leads to accurate reconstructions of the major white matter pathway, and an improved ability  
414 to describe complex white matter anatomy (Dell'Acqua & Tournier, 2018). The algorithm  
415 extracted peaks in the fibre orientation density function (fODF) at the centre of each voxel,  
416 where streamlines along the orientation of the fODF peaks were reconstructed using a step

417 size of 0.5mm. Streamline tracts were terminated if the direction of the pathway changed  
418 through an angle greater than 45° or if the fODF threshold fell below 0.05.

419 In ExploreDTI, manual tractography was carried out using AND, NOT, and SEED  
420 ROI gates on colour-coded FA maps to extract specific white matter tracts. AND gates  
421 (**Figure 4** - green) were used to extract fibres that passed through the gate, NOT gates  
422 (**Figure 4** - red) were used to exclude any fibres that passed through the gate, and finally  
423 SEED gates (**Figure 4** - blue) were used as a starting point to extract fibres that passed  
424 through this gate and then to include only those fibres that then passed through any added  
425 AND gates. Manual tractography was carried out on a minimum of 15 subjects in order to  
426 calculate a tract model to perform automated tractography on all 51 data sets (Explore DTI;  
427 Parker et al., 2013). This procedure enables the construction of white matter tracts in space  
428 in which streamlines belonging to particular anatomical features of interest consistently  
429 project to distinct sub-regions, allowing the reconstruction of streamline data by observing  
430 their projected positions (Parker et al., 2013). After running the automated tractography  
431 software each tract was visually inspected, and any erroneous fibres were pruned using  
432 additional NOT gates. These tract masks from the b=2400 data were then intersected with  
433 the b=1200 free-water corrected FA and MD maps to derive free-water corrected tract-  
434 specific measures of FA and MD values for statistical analysis.

435

436 *Inferior Longitudinal Fasciculus tractography.* The ILF (**Figure 4B**) was reconstructed using  
437 a two-ROI approach in each hemisphere (Wakana et al., 2007). In the mid-sagittal slice of  
438 the brain, the coronal crosshair was placed posterior to the corpus callosum. In the coronal  
439 plane a SEED gate was drawn around the entire cortex of interest. Next in the coronal view,  
440 the last slice where the temporal lobe was separate from the frontal lobe was identified and  
441 one AND gate was drawn around the temporal lobe. Any stray fibres not consistent with the

442 ILF pathway were removed with NOT gates. FA and MD of the right and left ILF were  
443 summed and averaged to provide a bilateral measure for the main analyses.

444

445 *Fornix tractography.* The fornix (**Figure 4A**) was traced in line with the landmarks described  
446 in Catani and Thiebaut de Schotten (2008). In the mid sagittal slice of the brain, the coronal  
447 crosshair was placed at the anterior commissure and moved approximately 6 voxels  
448 posterior in the brain. In the coronal plane, one AND gate was drawn around the fornix  
449 bundle where the anterior pillars enter the body of the fornix. Finally, NOT gates were drawn  
450 around any protruding areas that were not part of the fornix.

451

452 *Anterior and posterior hippocampal fornix tractography.* In addition, we employed a method  
453 adapted from prior work to reconstruct the anterior and posterior hippocampal fornix fibres  
454 (Christiansen et al., 2017). Both anterior and posterior hippocampal fornix reconstructions  
455 required the AND and NOT gates that were applied during whole fornix tractography. Some  
456 NOT gates were augmented to enable better extraction of the anterior and posterior  
457 hippocampal streamlines of the fornix. A standard landmark for the anterior-posterior  
458 hippocampal boundary was proposed to be a small bundle of grey matter that outlines the  
459 most anterior extent of the parahippocampal gyrus that is called uncal apex or uncus  
460 (Poppenk et al., 2013). This landmark was identified for each hemisphere separately when  
461 carrying out manual tractography of the anterior and posterior hippocampal fornix. In order to  
462 perform this, the uncus was first localised at its anterior part and traced to its posterior  
463 boundary. The first coronal slice in which the uncus was not visible anymore was used as  
464 the landmark in order distinguish between fibres that project into anterior (head of the  
465 hippocampus) and posterior hippocampus (body and tail of the hippocampus) (**Figure 4C**).

466 After the left and right hemispheric landmarks were identified, one NOT gate on each  
467 hemisphere was drawn around the hippocampus to set boundaries for posterior

468 hippocampal fornix tracts, removing fibres that pass through these NOT gates (**Figure 4D**).  
469 After the posterior hippocampal fornix was identified, the same coordinates of the anterior-  
470 posterior hippocampal boundary landmark for each hemisphere were used to replace the  
471 NOT gates with AND gates for the left and right anterior hippocampal fornix reconstruction  
472 (**Figure 4E**). The posterior, left, and right anterior hippocampal fornix were saved as  
473 separate tracts to aid subsequent automated tractography (**Figure 5**). Note that diffusion  
474 tensor metrics of the whole fornix and those averaged across anterior and posterior  
475 hippocampal fornix segments were highly correlated (FA,  $r(51) = 0.940$ ,  $p < 0.001$ ; MD,  $r(51)$   
476  $= 0.942$ ,  $p < 0.001$ ) indicating that the anterior and posterior hippocampal fornix  
477 reconstructions matched the whole fornix reconstructions.

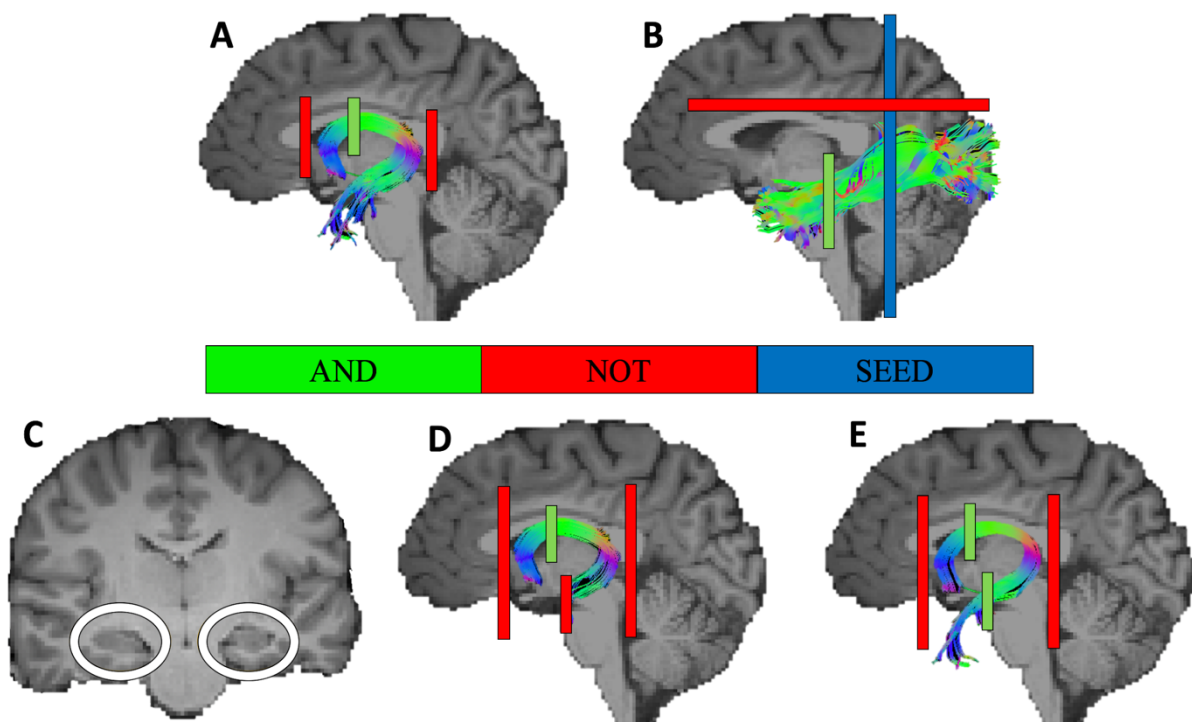

478

479 **Figure 4. Automated tractography reconstructions of the fornix, its anterior and**  
480 **posterior hippocampal fornix fibres and the inferior longitudinal fasciculus (ILF). AND**

481 (green), NOT (red), and SEED (blue) ROI gates for each of the tracts are displayed on the  
482 sagittal midline plane. (A) Fornix tractography using AND and NOT gates. (B) Left ILF  
483 tractography using SEED, AND and NOT gates. (C) Location of AND and NOT gates for  
484 tractography of the anterior and posterior hippocampal fornix, respectively. (D) Posterior  
485 hippocampal fornix tractography using one additional NOT gate placed between the head  
486 and the body of the hippocampus to only include fornical fibres that connect with posterior  
487 hippocampus (i.e., hippocampal body and tail). (E) Anterior hippocampal fornix tractography  
488 using one additional AND gate placed between the head and body of the hippocampus (i.e.,  
489 identical location as NOT gate in (D)) to include fibres that pass through this ROI gate to the  
490 anterior hippocampus.

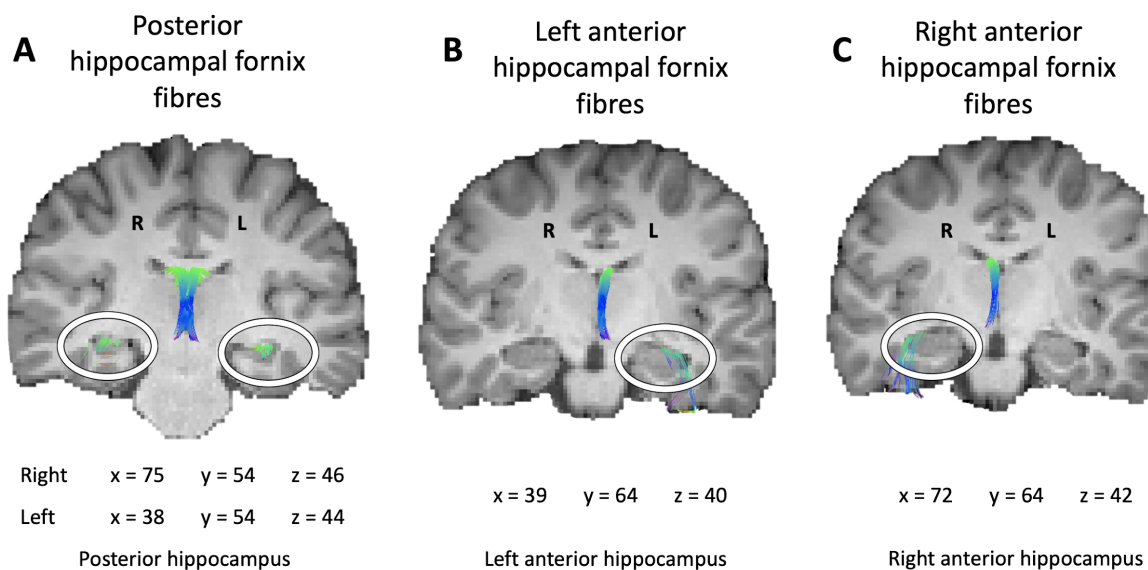

491

492 **Figure 5. Automated tractography reconstructions of anterior and posterior**  
493 **hippocampal fornix fibres on coronal slices.** Tractography of the fornix fibres projecting  
494 to the posterior hippocampus (A). Tractography of fornix fibres projecting to the left anterior  
495 hippocampus (B). Tractography of the fornix fibres projecting to the right anterior  
496 hippocampus (C).



497

498 *Statistical analyses*

499 For the questionnaire data, in the event of missing responses (2 participants failed to give a  
500 response to one PC item), the mean value of the remaining items that were answered in the  
501 full scale was calculated which then replaced the missing item score. For each curiosity  
502 subscale (i.e., the two subscales of PC and EC), we calculated a total score for each  
503 participant. Participants' data with diffusion tensor metrics  $\pm 3SD$  beyond the group mean  
504 were considered as outliers and removed from respective analyses. This resulted in one  
505 participant's data being removed from all analyses involving ILF MD and a different  
506 participant's data being removed from analyses including bilaterally averaged ILF FA.

507 To test for associations between curiosity trait scores and microstructure of our  
508 selected anatomical tracts, we conducted directional *Pearson's* correlations using MATLAB.  
509 Since higher FA and lower MD is typically associated with 'stronger' white matter  
510 connectivity (Vettel et al., 2017), we predicted a positive correlation between levels of  
511 curiosity and FA and a negative correlation with MD.

512 To determine whether the *Pearson's* correlation coefficient  $r$  was statistically  
513 significant, we performed non-parametric permutation tests that randomly permute the real  
514 data between participants. Permutation tests were conducted separately for the two  
515 microstructure metrics (i.e., FA and MD) and for the EC and PC scales. Importantly, we  
516 corrected for multiple comparisons across the subscales within a curiosity scale (e.g.,  
517 diversive- and specific PC). The steps were as follows: First, we performed *Pearson's*  
518 correlations on the real data (i.e., correlations between the scores of the two curiosity  
519 subscales and the microstructure measure (e.g., diversive PC with ILF MD and specific PC  
520 with ILF MD)). Thereby, we obtained the empirical correlation coefficients reflecting the  
521 relationship between the two curiosity subscales and a specific microstructure measure.  
522 Second, within each curiosity subscale, we shuffled the curiosity scores across participants,



523 which resulted in pairs containing a curiosity score and a microstructure value that is  
524 randomly assigned across participants. On these shuffled data, we then calculated surrogate  
525 *Pearson's* coefficients for the two curiosity subscale scores and the microstructure metric,  
526 and saved the maximum surrogate *Pearson's*  $r$  across the two correlations (i.e., subscale-  
527 microstructure<sub>max</sub>) (Groppe, Urbach & Kutas, 2011). Third, the second step was repeated  
528 5000 times. Based on the 5000 permutations, we created a null distribution of all surrogate  
529 subscale-microstructure<sub>max</sub> coefficient values and determined the alpha cut-off point  
530 ( $p < 0.05$ ; one-sided; i.e., 4750th data point of the surrogate null distribution) in order to test  
531 the statistical significance of the real *Pearson's* coefficients reflecting the relationship  
532 between the two subscales and the microstructure measure. This approach allowed us to  
533 correct for multiple comparisons across the two subscales within each curiosity scale. In  
534 follow-up analyses for specific curiosity subscales (e.g., interest EC subscale), we also  
535 performed follow-up permutation tests that corrected for multiple comparisons across both  
536 hemispheres (e.g., left and right ILF MD). The 95% confidence intervals (CI) for each  
537 correlation was derived using a bootstrapping method based on 1000 iterations. Olkin's  $z$   
538 test was used for the statistical comparison of dependent correlations, as implemented in the  
539  $r$  package 'cocor" (Diedenhofen & Musch, 2015).

540 **Author contributions**

541 A.V., K.S.G., A.D.L. and M.J.G. contributed to the conception and design of the experiment.

542 A.V. and A.C. contributed to data acquisition. All authors contributed to data analysis and

543 interpretation. A.V. and M.J.G. drafted the manuscript and together with C.J.H., K.S.G. and

544 A.D.L. revised the manuscript. A.D.L. and M.J.G. jointly supervised this work.

545

546 **Conflict of interests:** The authors declare no competing financial interests

547

548 **Acknowledgements:** We would like to thank the funders of this research as well as Ofer

549 Pasternak for providing the free-water correction pipeline, John Evans and Peter Hobden for

550 scanning support, Samuel Ridgeway and Bethany Coad for support in data collection, Sonya

551 Foley and Marie-Lucie Read for support in data pre-processing.

552

553 **Funding**

554 This work was supported by a departmental PhD studentship from the School of Psychology

555 at Cardiff University to A.V., a PhD studentship from the Cardiff University Neuroscience and

556 Mental Health Research Institute (NMHRI) to A.C., a Wellcome Strategic Award

557 (104943/Z/14/Z) to C.J.H, A.C, K.G., A.D.L., and a COFUND fellowship funded by the Welsh

558 Government and the European Commission and a Sir Henry Dale Fellowship

559 (211201/Z/18/Z) funded by Wellcome and the Royal Society to M.J.G.

560

## References

- 561 Aggleton, J. P. (2012). "Multiple Anatomical Systems Embedded within the Primate  
562 Medial Temporal Lobe: Implications for Hippocampal Function." *Neuroscience and  
563 Biobehavioral Reviews* 36 (7), 1579–96.
- 564 Aggleton, J.P., Wright, N.F., Rosene, D.L., & Saunders, R.C. (2015). Complementary  
565 patterns of direct amygdala and hippocampal projections to the macaque prefrontal  
566 cortex. *Cerebral Cortex* 25 (11), 4351-4373.
- 567 Agosta, F., Henry, R. G., Migliaccio, R., Neuhaus, J., Miller, B. L., Dronkers, N. F., ... &  
568 Gorno-Tempini, M. L. (2010). Language networks in semantic dementia. *Brain*, 133(1),  
569 286-299.
- 570 Baranes, A., Oudeyer, P. Y., & Gottlieb, J. (2015). Eye movements reveal epistemic curiosity  
571 in human observers. *Vision Research*, 117, 81–90.
- 572 Beaulieu, C. (2002). The basis of anisotropic water diffusion in the nervous system - A  
573 technical review. *NMR in Biomedicine*, 15(7–8), 435–455.
- 574 Bechler, M. E., Swire, M., & French-Constant, C. (2018). Intrinsic and adaptive myelination—  
575 A sequential mechanism for smart wiring in the brain. *Developmental neurobiology*,  
576 78(2), 68-79.
- 577 Berlyne, D. E. (1954). A theory of human curiosity. *British Journal of Psychology*, 3, 180–  
578 191.
- 579 Berlyne, D. E. (1966). Curiosity and Exploration. *Science*, 153(3731), 25–33.
- 580 Burgess, N., Maguire, E. A., & O'Keefe, J. (2002). The human hippocampus and spatial and  
581 episodic memory. *Neuron*, 35(4), 625-641.
- 582 Catani, M., & Thiebaut de Schotten, M. (2008). A diffusion tensor imaging tractography atlas  
583 for virtual in vivo dissections. *Cortex*, 44(8), 1105–1132.
- 584 Chen, L., Ralph, M. A. L., & Rogers, T. T. (2017). A unified model of human semantic  
585 knowledge and its disorders. *Nature human behaviour*, 1(3), 0039.

- 586 Chen, Y., Chen, K., Ding, J., Zhang, Y., Yang, Q., Lv, Y., ... & Han, Z. (2017). Brain network  
587 for the core deficits of semantic dementia: a neural network connectivity-behavior  
588 mapping study. *Frontiers in human neuroscience*, *11*, 267.
- 589 Christiansen, K., Metzler-Baddeley, C., Parker, G. D., Muhlert, N., Jones, D. K., Aggleton, J.  
590 P., & Vann, S. D. (2017). Topographic separation of fornical fibers associated with the  
591 anterior and posterior hippocampus in the human brain: An MRI-diffusion study. *Brain*  
592 *and Behavior*, *7*(1), 1–8.
- 593 Cohen, M. X., Schoene-Bake, J. C., Elger, C. E., & Weber, B. (2009). Connectivity-based  
594 segregation of the human striatum predicts personality characteristics. *Nature*  
595 *Neuroscience*, *12*(1), 32–34.
- 596 Collins, R. P., Litman, J. A., & Spielberg, C. D. (2004). The measurement of perceptual  
597 curiosity. *Personality and Individual Differences*, *36*(5), 1127–1141.
- 598 Davachi, L. (2006). Item, context and relational episodic encoding in humans. *Current*  
599 *opinion in neurobiology*, *16*(6), 693-700.
- 600 Dell'Acqua, F., & Tournier, J. D. (2018). Modelling white matter with spherical deconvolution:  
601 How and why?. *NMR in Biomedicine*, e3945.
- 602 DeYoung C.G., (2014). Openness/Intellect: A dimension of personality reflecting cognitive  
603 exploration. In: APA handbook of personality and social psychology: Personality  
604 processes and individual differences (Cooper ML, Larsen RJ, eds), pp369-399.  
605 Washington, DC: American Psychological Association.
- 606 Diedenhofen, B., & Musch, J. (2015). cocor: a comprehensive solution for the statistical  
607 comparison of correlations. *PLoS one*, *10*(3), e0121945.  
608 doi:10.1371/journal.pone.0121945.
- 609 Eichenbaum, H., Yonelinas, A. P., & Ranganath, C. (2007). The medial temporal lobe and  
610 recognition memory. *Annu. Rev. Neurosci.*, *30*, 123-152.

- 611 Eisenberg, I. W., Bissett, P. G., Enkavi, A. Z., Li, J., MacKinnon, D. P., Marsch, L. A., &  
612 Poldrack, R. A. (2019). Uncovering the structure of self-regulation through data-driven  
613 ontology discovery. *Nature communications*, *10*(1), 2319.
- 614 Enkavi, A. Z., Eisenberg, I. W., Bissett, P. G., Mazza, G. L., MacKinnon, D. P., Marsch, L.  
615 A., & Poldrack, R. A. (2019). Large-scale analysis of test–retest reliabilities of self-  
616 regulation measures. *Proceedings of the National Academy of Sciences*, *116*(12), 5472-  
617 5477.
- 618 Galli, G., Sirota, M., Gruber, M. J., Ivanof, B. E., Ganesh, J., Materassi, M., ... Craik, F. I. M.  
619 (2018). Learning facts during aging: the benefits of curiosity. *Experimental Aging*  
620 *Research*, *44*, 311-328.
- 621 Gottlieb, J., & Oudeyer, P. Y. (2018). Towards a neuroscience of active sampling and  
622 curiosity. *Nature Reviews Neuroscience*, *19*, 758-770.
- 623 Graham, K. S., Barense, M. D., & Lee, A. C. (2010). Going beyond LTM in the MTL: a  
624 synthesis of neuropsychological and neuroimaging findings on the role of the medial  
625 temporal lobe in memory and perception. *Neuropsychologia*, *48*(4), 831-853.
- 626 Grossnickle, E. M. (2016). Disentangling curiosity: Dimensionality, definitions, and  
627 distinctions from interest in educational contexts. *Educational Psychology*  
628 *Review*, *28*(1), 23-60.
- 629 Gruber, M. J., Gelman, B. D., & Ranganath, C. (2014). States of Curiosity Modulate  
630 Hippocampus-Dependent Learning via the Dopaminergic Circuit. *Neuron*, *84*(2), 486–  
631 496.
- 632 Gruber, M. J., Valji, A., & Ranganath, C. (2019). Curiosity and Learning: A Neuroscientific  
633 Perspective. In: *The Cambridge Handbook of Motivation and Learning*. (Renninger KA &  
634 Hidi SE, ed), pp 397-417. Cambridge University Press.
- 635 Herbet, G., Zemmoura, I., & Duffau, H. (2018). Functional anatomy of the inferior  
636 longitudinal fasciculus: from historical reports to current hypotheses. *Frontiers in*  
637 *neuroanatomy*, *12*, 77.

- 638 Hodgetts, C. J., Postans, M., Shine, J. P., Jones, D. K., Lawrence, A. D., & Graham, K. S.  
639 (2015). Dissociable roles of the inferior longitudinal fasciculus and fornix in face and  
640 place perception. *Elife*, *4*, e07902.
- 641 Hodgetts, C. J., Postans, M., Warne, N., Varnava, A., Lawrence, A. D., & Graham, K. S.  
642 (2017). Distinct contributions of the fornix and inferior longitudinal fasciculus to episodic  
643 and semantic autobiographical memory. *Cortex*, *94*, 1–14.
- 644 Hoffman, P., & Lambon Ralph, M. A. (2018). From percept to concept in the ventral temporal  
645 lobes: Graded hemispheric specialisation based on stimulus and task. *Cortex*, *101*, 107-  
646 118.
- 647 Horowitz-Kraus, T., Wang, Y., Plante, E., & Holland, S. K. (2014). Involvement of the right  
648 hemisphere in reading comprehension: a DTI study. *Brain research*, *1582*, 34-44.
- 649 Jones, D. K., Knösche, T. R., & Turner, R. (2013). White matter integrity, fiber count, and  
650 other fallacies: the do's and don'ts of diffusion MRI. *Neuroimage*, *73*, 239-254.
- 651 Jouen, A. L., Ellmore, T. M., Madden, C. J., Pallier, C., Dominey, P. F., & Ventre-Dominey,  
652 J. (2015). Beyond the word and image: characteristics of a common meaning system for  
653 language and vision revealed by functional and structural imaging. *NeuroImage*, *106*,  
654 72-85.
- 655 Kang, M. J., Hsu, M., Krajchich, I. M., Loewenstein, G., McClure, S. M., Wang, J. T., &  
656 Camerer, C. F. (2009). The wick in the candle of learning. *Psychological Science*, *20*(8),  
657 963–974.
- 658 Kashdan, T. B., & Yuen, M. (2007). Whether highly curious students thrive academically  
659 depends on perceptions about the school learning environment: A study of Hong Kong  
660 adolescents. *Motivation and Emotion*, *31*(4), 260–270.
- 661 Kumaran, D., & Maguire, E. A. (2009). Novelty signals: a window into hippocampal  
662 information processing. *Trends in cognitive sciences*, *13*(2), 47-54.
- 663 Lambon Ralph, M., Jefferies, E., Patterson, K., & Rogers, T. T. (2017). The neural and  
664 computational bases of semantic cognition. *Nature Reviews Neuroscience*, *18*(1), 42-55

- 665 Lauriola, M., Litman, J. A., Mussel, P., De Santis, R., Crowson, H. M., & Hoffman, R. R.  
666 (2015). Epistemic curiosity and self-regulation. *Personality and Individual Differences*,  
667 83(1), 202–207.
- 668 Leemans A, Jeurissen B, Sijbers J, Jones DK (2009). ExploreDTI: a graphical toolbox for  
669 processing, analyzing, and visualizing diffusion MR data. *Proceedings of the 17th*  
670 *Annual Meeting of International Society for Magnetic Resonance in Medicine* 17:3536.
- 671 Litman, J. A. (2005). Curiosity and the pleasures of learning: Wanting and liking new  
672 information. *Cognition and Emotion*, 19, 793–814
- 673 Litman, J. A. (2008). Interest and deprivation factors of epistemic curiosity. *Personality and*  
674 *Individual Differences*, 44(7), 1585–1595.
- 675 Litman, J. A., & Jimerson, T. L. (2004). The measurement of curiosity as a feeling of  
676 deprivation. *Journal of Personality Assessment*, 82(2), 147–157.
- 677 Litman, J., & Spielberger, C. (2003). Measuring epistemic curiosity and its diversive and  
678 specific components. *Journal of Personality Assessment*, 80(1), 75–86.
- 679 Liu, Z. X., Shen, K., Olsen, R. K., & Ryan, J. D. (2017). Visual sampling predicts  
680 hippocampal activity. *Journal of Neuroscience*, 37(3), 599-609.
- 681 Loewenstein, G. (1994). The psychology of curiosity: A review and reinterpretation.  
682 *Psychological Bulletin*, 116(1), 75–98.
- 683 Marvin, C. B., & Shohamy, D. (2016). Curiosity and reward: Valence predicts choice and  
684 information prediction errors enhance learning. *Journal of Experimental Psychology:*  
685 *General*, 145(3), 266–272.
- 686 McGillivray, S., Murayama, K., & Castel, A. D. (2015). Thirst for knowledge: The effects of  
687 curiosity and interest on memory in younger and older adults. *Psychology and Aging*,  
688 30(4), 835–841.
- 689 Murray, E. A., Wise, S. P., & Graham, K. S. (2017). The evolution of memory systems:  
690 ancestors, anatomy, and adaptations. Oxford University Press.

- 691 Murray, E. A., Wise, S. P., & Graham, K. S. (2018). Representational specializations of the  
692 hippocampus in phylogenetic perspective. *Neuroscience letters*, 680, 4-12.
- 693 Mussel, P. (2013). Introducing the construct curiosity for predicting job performance. *Journal*  
694 *of Organizational Behavior*, 34, 453–472.
- 695 O'Keefe, J. and Nadel, L. (1978) The hippocampus as a cognitive map, Oxford: Clarendon  
696 Press.
- 697 Otmakhova, N., Duzel, E., Deutch, A. Y., & Lisman, J. (2013). The hippocampal-VTA loop:  
698 the role of novelty and motivation in controlling the entry of information into long-term  
699 memory. In *Intrinsically motivated learning in natural and artificial systems*(pp. 235-254).  
700 Springer, Berlin, Heidelberg.
- 701 Panesar, S. S., Yeh, F. C., Jacquesson, T., Hula, W., & Fernandez-Miranda, J. C. (2018). A  
702 quantitative tractography study into the connectivity, segmentation and laterality of the  
703 human inferior longitudinal fasciculus. *Frontiers in neuroanatomy*, 12:47
- 704 Parker, G. D., Marshall, D., Rosin, P. L., Drage, N., Richmond, S., & Jones, D. K. (2013).  
705 Fast and fully automated clustering of whole brain tractography results using shape-  
706 space analysis. *Proceedings of the International Society for Magnetic Resonance in*  
707 *Medicine*. Salt Lake City, USA, 778.
- 708 Pasternak, O., Maier-Hein, K., Baumgartner, C., Shenton, M. E., Rathi, Y., & Westin, C. F.  
709 (2014). The estimation of free-water corrected diffusion tensors. In: Visualization and  
710 Processing of Tensors and Higher Order Descriptors for Multi-Valued Data (Westin CF.,  
711 Vilanova A., Burgeth B., eds), pp. 249-270. Springer, Berlin, Heidelberg.
- 712 Pasternak, O., Sochen, N., Gur, Y., Intrator, N., & Assaf, Y. (2009). Free water elimination  
713 and mapping from diffusion MRI. *Magnetic Resonance in Medicine* 62(3), 717-730.
- 714 Patterson, K., Nestor, P. J., & Rogers, T. T. (2007). Where do you know what you know?  
715 The representation of semantic knowledge in the human brain. *Nature Reviews*  
716 *Neuroscience*, 8(12), 976-987.



- 717 Poppenk, J., Evensmoen, H. R., Moscovitch, M., & Nadel, L. (2013). Long-axis  
718 specialization of the human hippocampus. *Trends in cognitive sciences*, 17(5), 230-240.
- 719 Privado, J., Román, F. J., Saéñz-Urturi, C., Burgaleta, M., & Colom, R. (2017). Gray and  
720 white matter correlates of the Big Five personality traits. *Neuroscience*, 349, 174–184.
- 721 Ranganath, C., & Ritchey, M. (2012). Two Cortical Systems for Memory-Guided Behaviour.  
722 Nature Reviews. *Neuroscience* 13 (10), 713–26.
- 723 Rice, G. E., Hoffman, P., Ralph, L., & Matthew, A. (2015). Graded specialization within and  
724 between the anterior temporal lobes. *Annals of the New York Academy of*  
725 *Sciences*, 1359(1), 84-97.
- 726 Ripollés, P., Biel, D., Peñalozza, C., Kaufmann, J., Marco-Pallarés, J., Noesselt, T., &  
727 Rodríguez-Fornells, A. (2017). Strength of Temporal White Matter Pathways Predicts  
728 Semantic Learning. *The Journal of Neuroscience*, 37(46), 1720–17.
- 729 Risko, E. F., Anderson, N. C., Lanthier, S., & Kingstone, A. (2012). Curious eyes: Individual  
730 differences in personality predict eye movement behavior in scene-  
731 viewing. *Cognition*, 122(1), 86-90.
- 732 Robin, J., & Moscovitch, M. (2017). Details, gist and schema: hippocampal–neocortical  
733 interactions underlying recent and remote episodic and spatial memory. *Current Opinion*  
734 *in Behavioral Sciences*, 17, 114-123.
- 735 Saunders, R. C., & Aggleton, J. P. (2007). Origin and topography of fibers contributing to the  
736 fornix in macaque monkeys. *Hippocampus*, 17(5), 396-411.
- 737 Seehaus, A., Roebroek, A., Bastiani, M., Fonseca, L., Bratzke, H., Lori, N., ... & Galuske,  
738 R. (2015). Histological validation of high-resolution DTI in human post mortem  
739 tissue. *Frontiers in Neuroanatomy*, 9, 98.
- 740 Sheldon, S., Fenerci, C., & Gurguryan, L. (2019). A Neurocognitive Perspective on the  
741 Forms and Functions of Autobiographical Memory Retrieval. *Frontiers in Systems*  
742 *Neuroscience*, 13.

- 743 Silvia, P. J., & Kashdan, T. B. (2009). Interesting things and curious people: Exploration and  
744 engagement as transient states and enduring strengths. *Social and Personality*  
745 *Psychology Compass*, 3(5), 785-797.
- 746 Smith, S. M. (2002). Fast robust automated brain extraction. *Human brain mapping*, 17(3),  
747 143-155.
- 748 Stare, C. J., Gruber, M. J., Nadel, L., Ranganath, C., & Gómez, R. L. (2018). Curiosity-  
749 driven memory enhancement persists over time but does not benefit from post-learning  
750 sleep. *Cognitive Neuroscience*, 9, 100-115.
- 751 Strange, B. A., Witter, M. P., Lein, E. S., & Moser, E. I. (2014). Functional organization of the  
752 hippocampal longitudinal axis. *Nature Reviews Neuroscience*, 15(10), 655.
- 753 Vazire, S., & Carlson, E. N. (2010). Self-knowledge of personality: Do people know  
754 themselves?. *Social and personality psychology compass*, 4(8), 605-620.
- 755 Vazire, S., & Carlson, E. N. (2010). Self-knowledge of personality: Do people know  
756 themselves?. *Social and personality psychology compass*, 4(8), 605-620.
- 757 Vettel, J. M., Cooper, N., Garcia, J. O., Yeh, F.-C., & Verstynen, T. D. (2017). White Matter  
758 Tractography and Diffusion-Weighted Imaging. eLS, 1–9.
- 759 Voss, J. L., Bridge, D. J., Cohen, N. J., & Walker, J. A. (2017). A closer look at the  
760 hippocampus and memory. *Trends in cognitive sciences*, 21(8), 577-588.
- 761 Wakana, S., Caprihan, A., Panzenboeck, M. M., Fallon, J. H., Perry, M., Gollub, R. L., ... &  
762 Blitz, A. (2007). Reproducibility of quantitative tractography methods applied to cerebral  
763 white matter. *Neuroimage*, 36(3), 630-644.
- 764 Woo, S. E., Chernyshenko, O. S., Longley, A., Zhang, Z.-X., Chiu, C.-Y., & Stark, S. E.  
765 (2014). Openness to experience: Its lower level structure, measurement, and cross-  
766 cultural equivalence. *Journal of Personality Assessment*, 96(1), 29–45.
- 767 Yeatman, J. D., Dougherty, R. F., Myall, N. J., Wandell, B. A., & Feldman, H. M. (2012).  
768 Tract profiles of white matter properties: automating fiber-tract quantification. *PloS one*,  
769 7(11), e49790.

770 Zhang, H., Schneider, T., Wheeler-Kingshott, C. A., & Alexander, D. C. (2012). NODDI:  
771 practical in vivo neurite orientation dispersion and density imaging of the human  
772 brain. *Neuroimage*, 61(4), 1000-1016.
